## 21 **Abstract**

### 22 **Background**

23 Innate immune responses of airway epithelium are important defences against respiratory  
24 pathogens and allergens. Newborn infants are at greater risk of severe respiratory infections  
25 compared to older infants. However, very little is known regarding human neonatal airway  
26 epithelium immune responses and whether age-related morphological and/or innate  
27 immune changes contribute to the development of airway disease.

### 28 **Methods**

29 We collected nasal epithelial cells from 41 newborn infants (23 term, 18 preterm) within 5  
30 days of birth. Repeat sampling was achieved for 24 infants (13 term, 11 preterm) at a median  
31 age of 12.5 months. Morphologically and physiologically authentic well-differentiated  
32 primary paediatric nasal epithelial cell (WD-PNEC) cultures were generated and characterised  
33 using light microscopy and immunofluorescence.

### 34 **Results**

35 WD-PNEC cultures were established for 15/23 (65%) term and 13/18 (72%) preterm samples  
36 at birth, and 9/13 (69%) term and 8/11 (73%) preterm samples at one-year. Newborn and  
37 infant WD-PNEC cultures demonstrated extensive cilia coverage, mucous production and  
38 tight junction integrity. Newborn WD-PNECs took significantly longer to reach full  
39 differentiation and were noted to have much greater proportions of goblet cells compared to  
40 one-year repeat WD-PNECs. No differences were evident in ciliated/goblet cell proportions  
41 between term- and preterm-derived WD-PNECs at birth or one-year old.

42 **Conclusion**

43 WD-PNEC culture generation from newborn infants is feasible and represents a powerful and  
44 exciting opportunity to study differential innate immune responses in human airway  
45 epithelium very early in life.

46

47

48

49

50

51

52

53

54

55

56

57

58

59

60

61

## 62 **Introduction**

63 The airway epithelium plays a crucial role in initiating airway innate immune response  
64 mechanisms in humans. It facilitates this initial response by providing a mechanical barrier to  
65 pathogen entry and releasing antimicrobial and inflammatory peptides in response to innate  
66 immune receptor stimulation by pathogens.(1) Certain respiratory disorders, including  
67 asthma and cystic fibrosis, are associated with altered airway epithelial cell (AEC) immune  
68 responses and impaired barrier function of the epithelium.(2,3) There is increasing evidence  
69 that asthma and other chronic respiratory disorders begin in early life and it is possible that  
70 airway innate immune responses undergo maturation in parallel with postnatal lung growth,  
71 differentiation, microbiome colonisation, and external infectious and non-infectious  
72 insults.(2,4) However, little is known regarding the development of these airway epithelial  
73 innate immune responses in early life.

74 In adults and children AECs can be obtained from brushings of the nasal or bronchial tracts  
75 and prior studies have demonstrated the successful use of both bronchial and nasal AEC  
76 cultures in investigating early life respiratory disorders.(5–8) However, undertaking  
77 bronchial brushings in very young infants is impractical, as acquiring samples could only be  
78 ethically conducted opportunistically when infants are intubated. As an alternative, the nasal  
79 passage provides an easily accessible source of AECs that is much less invasive. Recent  
80 publications have highlighted the potential benefit of this technique in investigating early  
81 changes in immune function in cystic fibrosis (CF) infants, in the study of the nasal  
82 transcriptome of infants, and in the innate immune responses of the airway epithelium to  
83 allergens as part of asthma pathogenesis research.(7,9,10) Mosler *et al* described the culture  
84 of nasal epithelial cells from CF infants, some of whom were as young as one-month old, but

85 to date, Miller *et al* is the only publication describing monolayer culture of nasal epithelial  
86 cells from newborn infants.(7)

87 One of the major drawbacks of studying human infant primary AECs is the challenge of  
88 reduced proliferation after a small number of cell passages. As a possible strategy to deal  
89 with this challenge, Wolf *et al* described the generation of conditionally reprogrammed cells  
90 (CRC) from harvested infant AECs with enhanced proliferative and survival capacity.(11)  
91 However, generating CRCs requires alteration of primary AECs and it remains unclear what  
92 impact this might have on AEC innate immune responses.

93 A further development in AEC culture has been the creation of differentiated epithelial cell  
94 cultures via formation of an air-liquid interface. Indeed, we previously described the  
95 formation of well-differentiated paediatric nasal airway epithelial cell cultures (WD-PNECs)  
96 from older infants and demonstrated this model reproduces many of the hallmarks of  
97 respiratory syncytial virus (RSV) cytopathogenesis seen *in vivo*.(6)

98 Young infants, especially those born prematurely, have increased susceptibility to severe  
99 respiratory disease following infections, such as respiratory syncytial virus infection  
100 (RSV).(12,13) Neonates in particular have much greater susceptibility to a variety of infections  
101 compared to older infants and adults.(14) Furthermore, encounters with pathogens during  
102 the crucial period of neonatal development may have long term impacts on future respiratory  
103 health.(15) For instance, it is known that severe RSV infection during early infancy is linked  
104 to later diagnosis of wheeze and asthma(16,17) and even later life respiratory diseases, such  
105 as chronic obstructive pulmonary diseases (COPD), may be associated with early life  
106 experiences.(4) Therefore, given the current limited knowledge of the development of early

107 AEC immune responses, greater understanding of these responses is needed to yield novel  
108 insights into the mechanisms of susceptibility underpinning childhood airway disease.

109 Here we report the first successful generation of WD-PNECs from infants at birth and compare  
110 this with WD-PNECs derived from the same infants at one-year old. This paper details the  
111 characterisation of this novel newborn airway model and describes the morphological  
112 differences between newborn and older infant airway epithelial cultures. Our work,  
113 therefore, presents an exciting opportunity to study “naive” human airway epithelial cells in  
114 early life and to investigate the developmental immunobiology of the airway epithelium over  
115 the first year of life.

116

## 117 **Methods**

### 118 **Subjects and study design**

119 Healthy newborn term infants, (37-42 weeks gestation) and preterm infants (28-34 weeks  
120 gestation) underwent a nasal brushing procedure up to 5 days after birth (median age 2 days,  
121 range 6 hours to 5 days) at the Royal Jubilee Maternity Hospital, Belfast. Infants with known  
122 severe congenital anomaly of the airway, immunodeficiency, or congenital heart disease at  
123 the time of recruitment were excluded. A repeat nasal brushing sample was taken from a  
124 subset of infants at one-year old and a medical questionnaire recording previous episodes of  
125 upper/lower respiratory tract symptoms and/or bronchiolitis was completed based on parent  
126 recall (see supporting information, S1 Appendix).

## 127 **Sampling of nasal epithelial cells**

128 Nasal airway epithelial cells (AECs) were harvested from healthy, non-sedated neonates at  
129 the earliest opportunity post-delivery. Nasal sampling was performed either with the  
130 neonate lying in a parent's arms or in a cot using the technique described by Miller *et al.*(7)  
131 In brief, the infant's head was gently secured using one hand and a 2.7 mm diameter  
132 interdental brush (DentoCare Professional, London, UK) was introduced into each nostril (one  
133 brush/nostril) in turn and gently rotated twice against the medial aspect of the inferior  
134 turbinate.

135 We collected nasal AECs from 41 newborn infants (23 term, 18 preterm) within the first 5  
136 days of life (median age 2 days, range 6 hours to 5 days) (Table 1). The procedure was well  
137 tolerated by all neonates with no adverse events such as overt bleeding noted.

|                                         | <b>Term (23)</b>      | <b>Preterm (18)</b>   |
|-----------------------------------------|-----------------------|-----------------------|
| <b>Male (%)</b>                         | 9 (39%)               | 10 (56%)              |
| <b>Mean gestational age (range)</b>     | 279 days (260 to 291) | 229 days (207 to 244) |
| <b>Mean birth weight (range)</b>        | 3396 g (2200 to 4210) | 1855 g (820 to 2540)  |
| <b>Caesarean section delivery</b>       | 3 (13%)               | 9 (50%)               |
| <b>Siblings at home</b>                 |                       |                       |
| 0                                       | 11 (48%)              | 8 (44%)               |
| 1                                       | 10 (43%)              | 6 (33%)               |
| 2                                       | 2 (9%)                | 1 (6%)                |
| >2                                      | 0 (0%)                | 3 (17%)               |
| <b>Maternal smoking antenatally (%)</b> | 3 (13%)               | 4 (22%)               |
| <b>FH of asthma/atopy (%)</b>           | 11 (48%)              | 7 (39%)               |
| <b>Antenatal steroids received (%)</b>  | 1 (4%)                | 18 (100%)             |

145  
146 **Table 1. Perinatal and delivery characteristics of enrolled subjects.**  
147 **FH = Family history**  
148

149 Nasal AECs from infants at one-year old were collected with the infant held in a parent's arms.  
150 A cepillo cell sampler brush (Deltlab SLU, Barcelona, Spain) was introduced into each nostril  
151 in turn using the same technique as described above. Repeat sampling was achieved for 24  
152 infants (13 term, 11 preterm) at a median age of 12.5 months (IQR: 12-14.75 months, range:

153 12-22 months) (table 2). Follow-up was not achieved in 17 infants either because parents  
 154 declined re-attendance or did not respond to re-attendance invitation. As for sampling at  
 155 birth, the nasal brushing procedure was well tolerated by all infants with no adverse events.

| Subject         | Age (M) | Sex | Recurrent URTIs | Bronchiolitis | Atopy | Medications           |
|-----------------|---------|-----|-----------------|---------------|-------|-----------------------|
| FT              | 16      | F   | Y               | N             | N     | None                  |
| FT              | 18      | F   | N               | N             | N     | None                  |
| FT              | 22      | F   | Y               | N             | Y     | IC, $\beta$ 2 agonist |
| FT              | 13      | F   | Y               | N             | N     | None                  |
| FT              | 15      | M   | N               | N             | N     | None                  |
| FT              | 15      | M   | Y               | Y (RSV)       | Y     | None                  |
| FT              | 13      | F   | N               | N             | N     | None                  |
| FT              | 15      | F   | N               | N             | N     | None                  |
| FT              | 13      | F   | N               | N             | N     | None                  |
| FT              | 14      | M   | N               | N             | Y     | None                  |
| FT              | 12      | F   | N               | N             | Y     | None                  |
| FT              | 14      | F   | N               | N             | Y     | None                  |
| FT              | 12      | M   | N               | N             | Y     | None                  |
| PM (33wks, GA)  | 12      | F   | Y               | Y (RSV)       | N     | None                  |
| PM (29wks, GA)  | 12      | M   | N               | N             | N     | None                  |
| PM (33wks, GA)  | 12      | M   | N               | N             | N     | None                  |
| PM (33wks, GA)  | 12      | M   | N               | N             | N     | None                  |
| PM (34 wks, GA) | 13      | F   | N               | N             | N     | None                  |
| PM (29 wks, GA) | 12      | M   | N               | N             | N     | H2 antagonist         |
| PM (32 wks, GA) | 12      | M   | Y               | N             | N     | None                  |
| PM (33 wks, GA) | 12      | F   | N               | N             | Y     | None                  |
| PM (33 wks, GA) | 12      | F   | N               | N             | Y     | None                  |
| PM (33 wks, GA) | 12      | F   | N               | N             | Y     | None                  |
| PM (33 wks, GA) | 12      | F   | N               | Y             | Y     | None                  |

156

157 **Table 2. Clinical history of infants returning for repeat sampling after first year of life.**  
 158 **FT = Full term, PM = Preterm, GA = gestational age, M= Months, RSV = Respiratory**  
 159 **Syncytial Virus, URTI= Upper respiratory tract infection, IC= inhaled corticosteroids**

160

161 **Processing of nasal samples and creation of WD-PNEC cultures**

162 Each brush, with attached cells, was placed in sterile phosphate buffered saline (PBS) mixed  
 163 with transport medium (DMEM, 0.1% Penicillin/streptomycin (1:1 V/V)). Paediatric nasal cells  
 164 were removed from the brushes and expanded in airway epithelial cell basal medium  
 165 supplemented with an airway epithelial cell growth medium supplement pack (Promocell,



166 Heidelberg, Germany) using established methods.(5,18) Upon reaching 70-80% confluency,  
167 the cells were seeded at passage 3 onto collagen-coated 6 mm diameter Transwells (Corning,  
168 Tewksbury, Massachusetts) at a density of  $1 \times 10^5$  cells/Transwell. After reaching confluency,  
169 air-liquid interface (ALI) conditions were established and maintained until complete  
170 differentiation occurred. Following complete differentiation, which was defined by extensive  
171 cilia coverage and mucus production under light microscopy, transepithelial electrical  
172 resistances (TEER) were measured, as described previously.(5)

### 173 **Immunofluorescence microscopy for WD-PNEC characterisation**

174 For WD-PNEC cultures, representative Transwells were fixed in 4% (v/v) paraformaldehyde  
175 (PFA) for 30 min at room temperature (RT). Fixed Transwells were stored in 70% ethanol at  
176 +4°C until used. To prepare for immunofluorescence staining, ethanol was removed and cells  
177 rinsed twice with 200-300  $\mu$ L PBS added to the apical surface (pH 7.4). Cells were  
178 permeabilised using 0.2% (v/v) Triton X-100 (Sigma-Aldrich, ST. Louis, Missouri) in PBS for 1 h  
179 at RT and subsequently blocked with 0.4% (w/v) bovine serum albumin (BSA) (Sigma-Aldrich,  
180 ST. Louis, Missouri) in PBS for 1 h at RT. Cultures were next stained for  $\beta$ -tubulin, Muc5Ac  
181 and nuclei (DAPI). Briefly, 200  $\mu$ L rabbit anti-Muc5Ac antibody (ab78660, Abcam, Cambridge,  
182 UK) (1:100 dilution in 0.4% (w/v) BSA (Sigma-Aldrich, ST. Louis, Missouri) in PBS) was added  
183 and incubated overnight at 4°C. Cultures were washed 3 times with 200-300 $\mu$ L PBS added to  
184 the apical surface (pH 7.4) for 5 min at RT. Two hundred  $\mu$ L anti-rabbit secondary antibody  
185 (A11011, Alexa-Fluor 568, Invitrogen, Waltham, Massachusetts) was added (1:500 dilution in  
186 0.4% (w/v) BSA (Sigma-Aldrich, ST. Louis, Missouri) in PBS) and incubated at 37°C for 1 h.  
187 Cultures were further washed 3 times with 200-300 $\mu$ L PBS added to the apical surface (pH  
188 7.4), and 200  $\mu$ L Cy3-conjugated mouse anti- $\beta$ -tubulin antibody (ab11309, Abcam,  
189 Cambridge, UK) added (1:200 dilution in 0.4% (w/v) BSA (Sigma-Aldrich, ST. Louis, Missouri)

190 in PBS) and incubated at 37°C for 1 h. Following further 3 x 200-300µL PBS (pH 7.4) washes  
191 added to the apical surface, nuclei were stained using DAPI-mounting medium (Vectashield,  
192 Vector Laboratories, Burlingame, California). Fluorescence was detected by confocal laser  
193 microscopy (TCS SP5 Leica, Germany) or by UV microscopy (Nikon Eclipse 90i, Nikon, Surrey,  
194 UK).

195 Cells from one representative Transwell for each culture were trypsinised and the cell  
196 suspension was either smeared onto two microscope slides or 200-250 µL of cell suspension  
197 was added to a cytofunnel (EZ single cytofunnel, Thermo Fisher Scientific, Waltham,  
198 Massachusetts) and spun at 100 rpm (Using Thermo Shandon Cytospin 4 Cytocentrifuge) for  
199 4 min onto a microscope slide. Smeared and cytopun slides were then fixed in 4% (v/v) PFA  
200 for 15 min at RT. Fixed slides were stored in the dark at -20°C until immunofluorescence was  
201 performed. Slides were stained either for ciliated cells (anti-β-tubulin) or goblet cells (anti-  
202 Muc5Ac). In brief, cells were permeabilised using 0.2% (v/v) Triton X-100 (Sigma-Aldrich, ST.  
203 Louis, Missouri) in PBS (pH 7.4) for 30 min at RT and subsequently blocked with 0.4% (w/v)  
204 bovine serum albumin (BSA) (Sigma-Aldrich, ST. Louis, Missouri) in PBS (pH 7.4) for 30 min at  
205 RT. One slide was stained for Muc5Ac by addition of 100 µL rabbit anti-Muc5Ac antibody  
206 (ab78660, abcam) (1:100 dilution in 0.4% (w/v) BSA (Sigma-Aldrich, ST. Louis, Missouri) in PBS)  
207 incubated overnight at 4°C, followed by 3 x 200 µL PBS (pH 7.4) washes for 5 min at RT before  
208 addition of 100 µL anti-rabbit secondary antibody (A11011, Alexa-Fluor 568, Invitrogen,  
209 Waltham, Massachusetts) (1:500 dilution in 0.4% (w/v) BSA (Sigma-Aldrich, ST. Louis,  
210 Missouri) in PBS) at 37°C for 1 h. A second slide was stained for β-tubulin by addition of 100  
211 µL Cy3-conjugated mouse anti-β-tubulin antibody (ab11309, Abcam, Cambridge, UK) (1:200  
212 dilution in 0.4% (w/v) BSA (Sigma-Aldrich, ST. Louis, Missouri) in PBS) incubated at 37°C for 1

213 h. Both slides next underwent 3 x 200  $\mu$ L PBS (pH 7.4) washes and nuclei were stained using  
214 DAPI-mounting medium (Vectashield, Vector Laboratories, Burlingame, California).  
215 Quantification of ciliated, goblet and total DAPI<sup>+</sup> cell numbers was undertaken for each slide  
216 by counting under fluorescent microscopy (Nikon Eclipse 90i; Nikon, Surrey, UK) and the  
217 proportion of ciliated and goblet cells relative to total DAPI<sup>+</sup> cell numbers was determined.

### 218 **Freezing and defrosting of harvested nasal epithelial cells**

219 Expanded paediatric nasal cells were trypsinised at passage 3, added to low glucose DMEM  
220 containing 5% (v/v) foetal bovine serum (FBS) and centrifuged for 5 min at 129 x *g*. Following  
221 supernatant removal, the resulting cell pellet was re-suspended in monolayer medium  
222 (epithelial cell basal growth medium, Promocell, Heidelberg, Germany) containing 10% FBS  
223 and 10% dimethylsulfoxide (DMSO) (Sigma-Aldrich, ST. Louis, Missouri) to give a final  
224 concentration of 1 x 10<sup>6</sup> cells/mL. One mL aliquots of the cell suspension in cryovials were  
225 placed into an isopropanol cell freezing apparatus (Mr Frosty, Nalgene, Thermo Fisher  
226 Scientific, Waltham, Massachusetts) at RT and transferred to -80°C for 24 h, before being  
227 stored long-term in the gaseous phase of a liquid Nitrogen (N<sub>2</sub>) tank.

228 To resuscitate frozen primary nasal epithelial cells, vials were removed from the liquid N<sub>2</sub>,  
229 defrosted rapidly in a water bath at 37°C and the contents centrifuged at 129 x *g* for 5 min.  
230 The resulting cell pellet was re-suspended in monolayer medium (epithelial cell basal growth  
231 medium, Promocell, Heidelberg, Germany), transferred to a collagen-coated 75 cm<sup>2</sup> flask  
232 (Thermo Fisher Scientific, Waltham, Massachusetts) and incubated at 37°C in 5% CO<sub>2</sub>. The  
233 generation of WD-PNEC cultures then proceeded as described above.

234 **Statistical analysis**

235 Data are presented as means  $\pm$  standard deviation and median, interquartile range (IQR) and  
236 range for skewed data. Statistical analysis was performed by a student's paired or unpaired t-  
237 test unless otherwise stated. Statistical significance was set at a p-value less than 0.05 (\* p <  
238 0.05 or \*\*p <0.01). Data were analyzed using GraphPad® Prism 5.0 (GraphPad Software, Inc.,  
239 La Jolla, CA).

240 **Ethics statement**

241 Written informed consent was obtained from parents at recruitment. Study was approved by  
242 the Office for Research Ethics Committee Northern Ireland (ORECNI), (REC reference  
243 14/NI/0056).

244

245

246

247

248

249

250

251

252

253

254

## 255 **Results**

### 256 **WD-PNEC cultures from preterm and term newborn infants demonstrate similar** 257 **differentiation schedules and success rates**

258 Primary monolayers were successfully established in 18 term and 15 preterm infants (80%).  
259 One sample failed to grow due to fungal contamination during culture. For the remaining  
260 samples, culture failure was due to insufficient cells harvested following brushing. Following  
261 establishment of primary monolayer culture, the subsequent success rate of differentiation  
262 into WD-PNECs was 30/33 (91%). Of the three cultures failing to achieve differentiation no  
263 obvious cause was evident, but it may be due to low sample yield resulting in cell division  
264 beyond the upper limit at which successful cell differentiation can occur. Although numbers  
265 were low, there was no correlation evident between maternal antenatal smoking and cell  
266 culture failure. Overall, the rate of success for complete differentiation from initial sample  
267 acquisition was 15/23 (65%) for recruited term neonates and 13/18 (72%) for recruited  
268 preterm neonates. WD-PNEC differentiation was established by the formation of extensive  
269 cilia coverage in all quadrants of each Transwell with clear mucous production and no holes  
270 evident, as observed under light microscopy. No significant difference was noted in the  
271 median duration of time required to achieve differentiation in term (77.5 days; IQR: 74 to 94,  
272 range: 64 to 97 days) and preterm (80 days; IQR: 70 to 88, range 61 to 133 days) cultures.

273

### 274 **Term- and preterm-derived newborn WD-PNEC cultures are morphologically** 275 **indistinguishable**

276 Newborn term and preterm WD-PNEC cultures were indistinguishable under phase-contrast  
277 light microscopy (figure 1A). Fluorescent microscopy of fixed and stained cultures confirmed

278 the formation of multi-layered pseudostratified cultures containing ciliated and goblet cells  
279 (figure 1B). The mean proportions of ciliated cells in fixed and stained Transwells were similar  
280 in term- and preterm-derived WD-PNEC cultures (29.2% and 34.2%, respectively), as were the  
281 goblet cell proportions (26.7% and 23%, respectively) (figure 1C). These proportions were  
282 comparable to mean proportions of ciliated and goblet cells observed in representative  
283 trypsinised Transwell smears and cytopins (figure 1D). Tight junction integrity, as  
284 demonstrated by robust transepithelial electrical resistance (TEERs) of  $\geq 300 \Omega \cdot \text{cm}^{-2}$ , was  
285 evident for most Transwells in both term and preterm derived WD-PNEC cultures, with no  
286 significant difference between cohorts (figure 1E). Three term WD-PNEC cultures had TEERs  
287  $\leq 300 \Omega \cdot \text{cm}^{-2}$ ; however these cultures demonstrated extensive apical cilia coverage and  
288 obvious mucous production with no holes evident under phase-contrast light microscopy.

289

290 **Figure 1. Morphology and differentiation status of newborn term and preterm WD-PNEC**  
291 **cultures.** Cultures were monitored by (A) phase-contrast microscopy (magnification x20) or  
292 (B) confocal microscopy after staining for  $\beta$ -tubulin (ciliated cell marker) (red), Muc5Ac  
293 (goblet cell marker) (green), or nuclei (DAPI) (blue). For (B), square panels represent *en face*  
294 images, whereas rectangular panels represent orthogonal sections, with the apical side at the  
295 top (magnification x63, with x1.5 digital zoom, bar = 20  $\mu\text{m}$ ). (C) Transwell cultures from term  
296 and preterm donors (n=4 each) were fixed and stained for ciliated or goblet cells. Images from  
297 5 fields/Transwell were taken at magnification x60 and ciliated, goblet cell and total DAPI<sup>+</sup> cell  
298 numbers were counted using fluorescent microscopy. The % ciliated and goblet cells were  
299 determined relative to total DAPI<sup>+</sup> cell numbers. Data are presented as mean ( $\pm$ SD). (D)  
300 Transwells cultures were trypsinized, contents fixed onto slides by smearing or use of cytopsin

301 funnels, as described, and stained for ciliated (anti- $\beta$ -tubulin) and goblet (anti-Muc5Ac) and  
302 total DAPI<sup>+</sup> cells (n=9 term, n=10 preterm). Ciliated and goblet cell numbers were expressed  
303 as a percentage of the total DAPI<sup>+</sup> cell numbers. Data presented as mean ( $\pm$ SD). (E)  
304 Transepithelial electrical resistances (TEER) of neonatal term- and preterm-derived WD-  
305 PNECs. Measured by EVOM epithelial voltometer and presented as mean ( $\pm$ SD) Ohm.cm<sup>2</sup>

306

307 **Nasal AECs from one-year old infants achieve complete differentiation faster than those**  
308 **from newborn infants**

309 Primary monolayers were successfully established in 10/13 (77%) term and 9/11 (82%)  
310 preterm of repeat nasal brushing samples. Following establishment of primary monolayer  
311 culture the subsequent success rate of differentiation into WD-PNECs was 17/19 (89%). Of  
312 the two cultures failing to achieve differentiation no obvious cause was evident. Overall, the  
313 rate of success for differentiation from initial sample acquisition was 9/13 (69%) for one-year  
314 term infants and 8/11 (73%) for one-year preterm infants. Importantly, the time to achieve  
315 complete culture differentiation was significantly shorter for one-year cohort samples  
316 (median 63.5 days; IQR 49 to 72 days) than for birth cohort samples (median 80 days; IQR 72  
317 to 133 days), p=0.0001 (2-tailed Mann-Whitney U).

318

319 **WD-PNEC cultures derived from one-year old infants demonstrate significantly reduced**  
320 **goblet cell content compared to their paired newborn-derived WD-PNECs**

321 One-year WD-PNEC cultures were indistinguishable from newborn-derived cultures under  
322 phase-contrast light microscopy. As for newborn-derived WD-PNECs, there was no difference  
323 observed between the proportions of ciliated and goblet cells in term and preterm-derived

324 cultures at one year (figure 2). However, we observed a significant decrease in mean goblet  
325 cell proportions at one-year compared to newborn-derived WD-PNECs for both term (11.7%  
326 vs 25.5%;  $p=0.0003$ ) and preterm cohorts (8.9% vs 33.1%; ( $p<0.0001$ ) when trypsinised  
327 Transwell cell smear proportions were examined (figure 2D).

328 We noted the total number of cells per Transwell culture was higher for the one-year versus  
329 newborn cohort (Figure 2E). Therefore, to determine if the observed differences in goblet  
330 cell proportions could be explained by differences in total cell numbers within  
331 pseudostratified cultures we re-analysed the data as total goblet cell numbers for each donor.  
332 Consistent with the proportion data, combined total goblet cell count for all newborn-derived  
333 WD-PNECs (mean= 93,797 cells; SD 39427) was double that of one-year derived-WD-PNECs  
334 (mean= 46,969; SD 28607: t-test of difference in means,  $p=0.0014$ ) (figure 2F). These data  
335 suggest the observed decrease in goblet cell proportions in one-year-derived WD-PNECs is  
336 not simply the result of increased total WD-PNEC culture cell numbers in the one-year cohort.

337

338 **Figure 2. Morphology and differentiation status of birth and one-year repeat WD-PNEC**  
339 **cultures.** Cultures were monitored by (A) phase-contrast microscopy (magnification x20) or  
340 (B) confocal microscopy after staining for  $\beta$ -tubulin (ciliated cell marker) (red), Muc5Ac  
341 (goblet cell marker) (green), or nuclei (DAPI) (blue). For (B), square panels represent *en face*  
342 images, whereas rectangular panels represent orthogonal sections, with the apical side at the  
343 top (magnification x63, with x1.5 digital zoom, bar = 20  $\mu$ m). (C) Transwell cultures from birth  
344 and 1-year donors ( $n=8$  each) were fixed and stained for ciliated, goblet and total DAPI<sup>+</sup> cells.  
345 Images from 5 fields/Transwell were taken at x60 magnification and ciliated, goblet and total  
346 DAPI<sup>+</sup> cell numbers were counted using fluorescent microscopy. The % ciliated and goblet



347 cells were determined relative to total DAPI<sup>+</sup> cell numbers. (D) Representative preterm and  
348 term Transwell cultures (newborn term n=9, preterm n=10, one-year term n=9, preterm n=6  
349 donors) were trypsinised, contents fixed onto slides by smearing or use of cytopsin funnels,  
350 as described, and stained for ciliated (anti- $\beta$ -tubulin), goblet (anti-Muc5Ac), and total DAPI<sup>+</sup>  
351 cells. Ciliated and goblet cell numbers were expressed as mean ( $\pm$ SD) % proportion of total  
352 DAPI<sup>+</sup> cell numbers for each cohort. \*\*\* unpaired t-test,  $p < 0.0001$ . (E) Transwell cultures were  
353 trypsinized and total cell count performed by trypan blue exclusion using a haemocytometer.  
354 Total cell numbers are presented as mean ( $\pm$ SD) for newborn (n=17) and 1-year cohorts  
355 (n=15),  $p = 0.0087$  (unpaired t-test of difference in means). (F) Combined total goblet cell  
356 numbers were determined for trypsinised representative Transwell cultures. Data plotted for  
357 newborn (n=17) and 1-year (n=15) cohorts as mean ( $\pm$ SD) for each culture cohort.  
358 \*\*\*unpaired t-test of difference in means,  $p = 0.0005$ .

359

360 **Nasal primary AECs successfully differentiate after storage in liquid nitrogen and are**  
361 **morphologically indistinguishable from freshly differentiated AECs**

362 We next sought to determine if nasal AECs could be successfully frozen and stored, as this  
363 vastly increases the versatility of this model for future research into the origins of airway  
364 disease. Newborn and one-year old nasal samples stored in liquid N<sub>2</sub> for approximately one  
365 year were defrosted as described and expanded to enable Transwell seeding and  
366 differentiation.

367 Both samples successfully differentiated in a similar fashion, requiring one additional week to  
368 achieve complete differentiation compared to fresh counterparts. Differentiation was  
369 evidenced by the formation of extensive cilia coverage in all quadrants of each Transwell with

370 clear mucous production under light microscopy (figure 3A). The extra week was due to  
371 additional time needed to enable cell expansion in monolayers prior to Transwell seeding.  
372 Transepithelial electrical resistances (TEERs)  $>300 \text{ Ohm.cm}^{-2}$  were recorded for Transwells in  
373 both cultures indicating robust epithelial cell tight junction formation. As described above for  
374 freshly processed nasal epithelial cells, fluorescent microscopy of fixed and stained WD-PNEC  
375 cultures derived from frozen cells confirmed extensive ciliated and goblet cell contents (figure  
376 3B). Importantly, proportions of goblet and ciliated cells in frozen samples were very similar  
377 to those from the same donor cultured without freezing, with the unusually high goblet cell  
378 content from this donor being reproduced (figure 3C). While this was limited to cells from a  
379 single donor, our data demonstrate a proof of principle for the use of freezing newborn nasal  
380 epithelial cells for subsequent culture, differentiation and experimentation.

381 **Figure 3. Morphology and differentiation status of WD-PNEC cultures derived from**  
382 **epithelial cells frozen at passage 3.** Cultures were visualised by (A) phase-contrast microscopy  
383 (magnification x20) or (B) confocal microscopy after staining for  $\beta$ -tubulin (ciliated cell  
384 marker) (red), Muc5Ac (goblet cell marker) (green), or nuclei (DAPI) (blue). For (B), square  
385 panels represent *en face* images, whereas rectangular panels represent orthogonal sections,  
386 with the apical side at the top (magnification x63, with x1.5 digital zoom, bar = 20  $\mu\text{m}$ ). (C)  
387 Representative Transwell cultures derived from n= 1 newborn donor either differentiated  
388 “fresh” or following a period of storage in liquid nitrogen “frozen” were fixed and stained for  
389 ciliated, goblet and total DAPI<sup>+</sup> cells. Images from 5 fields/Transwell were taken at x60  
390 magnification and ciliated, goblet and total DAPI<sup>+</sup> cell numbers were counted using  
391 fluorescent microscopy. The % ciliated and goblet cells were determined relative to total  
392 DAPI<sup>+</sup> cell numbers.

## 393 **Discussion**

394 Very little is known regarding the development of the human airway epithelium in early life  
395 and how innate immune responses to airborne pathogens and allergens change with  
396 increasing age. We are not aware of any previously published studies describing the  
397 successful differentiation and characterisation of human newborn AECs and as such this work  
398 represents a unique model for studying early life airway epithelium immune responses.

399 As described by Miller *et al*, we found the nasal brushing procedure to be safe and well  
400 tolerated by infants. Our culture success rate for the newborn cohort of 80% for monolayer  
401 cultures is similar to passage 3 success rates for Miller *et al*.(7) Sample success rates for one-  
402 year old infants were almost identical to rates of success for the birth cohort, indicating  
403 consistency of sampling and culture technique throughout the study. The generation of  
404 morphologically authentic WD-PNECs from newborn AEC monolayer cultures that  
405 demonstrated typical pseudostratified columnar epithelium, goblet and ciliated cell  
406 generation, mucous production and robust TEERs was achieved with a high success rate  
407 (91%). This indicates our technique is reliable in enabling establishment of WD-PNECs from  
408 newborn samples. While the relatively small sample size in our current study limits correlation  
409 of findings with *in vivo* clinical characteristics, including relevance of atopy or susceptibility to  
410 recurrent upper respiratory tract infection, the consistency of this technique highlights its  
411 accessibility for use in future studies.

412 WD-PNECs generated from term and preterm newborn infants were morphologically and  
413 physiologically indistinguishable. Differentiation was achieved in a similar time frame for  
414 both. Importantly, this indicates no obvious impact of gestational age on AEC growth and  
415 differentiation. However, intriguingly, we detected morphological and differentiation

416 differences between WD-PNECs generated from newborn and one-year old infants,  
417 suggesting age-related developmental changes occur in nasal AECs during the first year of life.

418 The difference in the speed at which full WD-PNEC differentiation is achieved between  
419 newborn and one-year samples is an interesting finding. Indeed, it may represent an  
420 increased capacity for nasal AEC proliferation and differentiation at one-year compared to  
421 the neonatal period. Differences in epithelial cell proliferation speed and functionality  
422 between neonatal, later postnatal age and adulthood have been observed in other epithelial  
423 tissues, namely, in human skin keratinocytes and in mice gastrointestinal epithelium.(19,20)  
424 Mice studies have demonstrated that intestinal epithelial cell turnover is much faster in older  
425 animals compared to neonates and it has been proposed this difference is regulated  
426 intrinsically by genetic programming, mediated in part by the transcriptional repressor B-  
427 lymphocyte-induced maturation protein 1 (Blimp1).(21) It is possible that similar intrinsic  
428 programming determines the rate of human AEC proliferation and differentiation. However,  
429 we do note that nasal sampling in newborn infants is limited by their comparatively smaller  
430 nasal passages, which in principle could result in reduced initial AEC basal cell yield. This might  
431 require more cell doublings and therefore longer times to achieve sufficient cell numbers for  
432 differentiation. We did not directly address basal cell numbers in brushing as it would  
433 necessitate sacrificing the sample. Instead, we observed cell adherence to the collagen-  
434 coated plastic from the brushes and found no obvious differences between brush samples  
435 from newborns and one-year olds.

436 In regards to proportions of ciliated and goblet cells, we observed that WD-PNECs derived  
437 from the one-year cohort in this study were similar to previous work in WD-PNECs from older  
438 infants.(6) In contrast, we observed significantly higher proportions of goblet cells in the

439 newborn-derived WD-PNECs compared to one-year WD-PNECs. This is a valuable finding that  
440 has not previously been described. We are aware of only one study examining the proportion  
441 of mucous secreting cells in human newborn airway epithelium performed on post-mortem  
442 paraffin-embedded lung sections. This work only included three infants over 6 months old,  
443 thus its comparability with our work is limited.(22) Respiratory viral infections, such as RSV,  
444 result in excess mucous production and formation of thick mucous plugs, which contribute to  
445 the pathogenesis of respiratory viral diseases.(23) Thus, our finding of increased goblet cell  
446 content in newborn airways compared to older infants could contribute to increased mucous  
447 plug formation during viral infections and may explain, in part, the increased frequency of  
448 severe respiratory viral disease in very young infants. Indeed, there is some evidence to  
449 support such a hypothesis in the neonatal mouse model, where increased levels of Muc5Ac  
450 expression detected at baseline in neonatal versus adult mice was shown to further increase  
451 in response to human rhinovirus infection.(24,25) Increased goblet cell numbers are also  
452 observed in asthmatic airways and it is theorised overexpression is due to release of T helper  
453 2 (Th2) cytokines in response to allergen-induced inflammation.(26) Interestingly, during  
454 fetal development and the early newborn period, human innate immune responses are  
455 biased towards Th2-cell polarising responses.(27) It is possible Th2 bias may offer an  
456 explanation as to why newborn WD-PNECs demonstrate increased goblet cell proportions.  
457 Further work is needed to determine the mechanisms contributing to this increase which may  
458 yield insights into diseases, such as asthma, where goblet cell hyperplasia is a feature.

459 Due to the small numbers involved in this study we could not determine any significant  
460 correlation between parental reports of severe or recurrent URIs and goblet cell proportions.

461 Furthermore, we recognise that parental reporting of clinical symptoms is limited by potential  
462 recall bias which must be considered when interpreting our clinical characteristics data.

463 One potential limitation with our model is the use of nasal rather than bronchial AECs and  
464 there is debate regarding the validity of nasal AECs as surrogates to investigate lung  
465 disease.(28) Some studies of airway inflammation in adult populations have not  
466 demonstrated that nasal AECs can substitute for bronchial AECs, such as in COPD.(29)  
467 However, studies of bronchial AECs in children have thus far been largely opportunistic,  
468 sampling children when anaesthetised to allow access to the bronchial epithelium. (8,30,31)  
469 Evidently, as we have discussed earlier, bronchial sampling is not appropriate in newborn  
470 infants who are otherwise well. Moreover, use of bronchial AECs would not permit repeated  
471 sampling within the same healthy subject, which is one of the most attractive exploitations of  
472 our model. Furthermore, indistinguishable epithelial morphology has been reported in  
473 paired nasal and bronchial AEC cultures from both adults and children, while more recent  
474 work in paediatric asthma, atopy and respiratory syncytial virus infection demonstrated that  
475 nasal AECs act as reasonable surrogates for lower airway AECs.(6,32–34)

476 In conclusion, we present the first description of morphologically and physiologically  
477 authentic WD-PNEC cultures generated from term and preterm newborn infants. We  
478 demonstrated this to be a safe, minimally invasive method that can be performed consistently  
479 with high rates of success. Attaining follow-up in over half of initially enrolled infants provided  
480 sufficient numbers to enable robust comparisons between groups and demonstrates the  
481 feasibility of sequential sampling of subjects for future research studies. Accordingly, our  
482 model of the neonatal airway presents a unique opportunity to study differences contributing  
483 to the increased severity of respiratory infections seen in this age group compared to older

484 infants. Furthermore, the successful protocol for freezing nasal AECs to enable differentiation  
485 at a later date presents an opportunity for even greater flexibility in using these samples for  
486 research into childhood respiratory illnesses. For instance, this methodology offers a unique  
487 opportunity to store “naive” AECs and differentiation may be performed at a later date once  
488 absence/presence of subsequent respiratory disease, e.g. asthma, has been established.  
489 Thus, newborn WD-PNECs represent a unique opportunity to study innate immune responses  
490 of human airway epithelium from birth, and have significant and exciting potential  
491 applications in elucidating the early origins of respiratory disease.

492

### 493 **Acknowledgements**

494 We are extremely grateful to the parents and infants whose participation in this study made  
495 it possible. We would also like to thank Isobel Douglas, research nurse, for assistance in  
496 training in the technique of nasal brushing sampling.

497

498 **References**

499

- 500 1. Parker D, Prince A. Innate Immunity in the Respiratory Epithelium. *Am J Respir Cell*  
501 *Mol Biol.* 2011; 45(18): 189–201.
- 502 2. Holgate ST. The sentinel role of the airway epithelium in asthma pathogenesis.  
503 *Immunol Rev.* 2011; 242: 205–219.
- 504 3. Cohen TS, Prince A. Cystic fibrosis : a mucosal immunodeficiency syndrome. *Nat Med.*  
505 2013; 18(4): 509–519.
- 506 4. Martinez F. Early-Life Origins of Chronic Obstructive Pulmonary Disease. *N Engl J Med.*  
507 2016; 375: 871–878.
- 508 5. Villenave R, Thavagnanam S, Sarlang S, Parker J, Douglas I, Skibinski G, et al. In vitro  
509 modeling of respiratory syncytial virus infection of pediatric bronchial epithelium, the  
510 primary target of infection in vivo. *Proc Natl Acad Sci U S A.* 2012; 109(13): 5040–  
511 5045.
- 512 6. Guo-Parke H, Canning P, Douglas I, Villenave R, Heaney LG, Coyle P V, et al. Relative  
513 respiratory syncytial virus cytopathogenesis in upper and lower respiratory tract  
514 epithelium. *Am J Respir Crit Care Med.* 2013; 188(7): 842–851.
- 515 7. Miller D, Turner SW, Spiteri-Cornish D, McInnes N, Scaife A, Danielian PJ, et al. Culture  
516 of airway epithelial cells from neonates sampled within 48-hours of birth. *PLoS One.*  
517 2013; 8(11): e78321. doi: 10.1371/journal.pone.0078321
- 518 8. Parker J, Sarlang S, Thavagnanam S, Williamson G, O’Donoghue D, Villenave R, et al. A



- 519 3-D well-differentiated model of pediatric bronchial epithelium demonstrates  
520 unstimulated morphological differences between asthmatic and nonasthmatic cells.  
521 *Pediatr Res.* 2010; 67(1): 17–22.
- 522 9. Mosler K, Coraux C, Fragaki K, Zahm J. Feasibility of nasal epithelial brushing for the  
523 study of airway epithelial functions in CF infants. *J Cyst Fibros.* 2008; 7: 44–53.
- 524 10. Chu C-Y, Qiu X, Wang L, Bhattacharya S, Lofthus G, Corbett A, et al. The Healthy Infant  
525 Nasal Transcriptome: A Benchmark Study. *Sci Rep.* 2016; 6: 33994.
- 526 11. Wolf S, Perez GF, Mukharesh L, Isaza N, Preciado D, Freishtat RJ, et al. Conditional  
527 reprogramming of pediatric airway epithelial cells: a new human model to investigate  
528 early life respiratory disorders. *Pediatr Allergy Immunol.* 2017; 28(8): 810-817.
- 529 12. Birkhaug IM, Inchley CS, Aamodt G, Ånestad G, Nystad W, Nakstad B. Infectious  
530 burden of respiratory syncytial virus in relation to time of birth modifies the risk of  
531 lower respiratory tract infection in infancy: the Norwegian Mother and Child Cohort.  
532 *Pediatr Infect Dis J.* 2013; 32(6): e235-241.
- 533 13. Battersby AJ, Gibbons DL. The gut mucosal immune system in the neonatal period.  
534 *Pediatr Allergy Immunol.* 2013; 24(5): 414–421.
- 535 14. Marodi L. Neonatal Innate Immunity to Infectious Agents. *Infect Immun.* 2006; 74(4):  
536 1999–2006.
- 537 15. Lambert L, Culley FJ. Innate immunity to respiratory infection in early life. *Front*  
538 *Immunol.* 2017; 8: 1–9.
- 539 16. Sigurs N, Gustafsson PM, Bjarnason R, Lundberg F, Schmidt S, Sigurbergsson F, et al.

- 540 Severe respiratory syncytial virus bronchiolitis in infancy and asthma and allergy at  
541 age 13. *Am J Respir Crit Care Med.* 2005; 171(2): 137–141.
- 542 17. Sigurs N, Aljassim F, Kjellman B, Robinson PD, Sigurbergsson F, Bjarnason R, et al.  
543 Asthma and allergy patterns over 18 years after severe RSV bronchiolitis in the first  
544 year of life. *Thorax.* 2010; 65(12): 1045–1052.
- 545 18. Broadbent L, Villenave R, Hong G-P, Douglas I, Shields MD, Power UF. In Vitro  
546 Modeling of RSV Infection and Cytopathogenesis in Well-Differentiated Human  
547 Primary Airway Epithelial Cells (WD-PAECs). In: Tripp RA, Jorquera P, editors. *Human*  
548 *Respiratory Syncytial Virus.* Springer; 2016. p. 199–139.
- 549 19. Krejčí E, Kodet O, Szabo P, Borský J, Smetana K, Grim M, et al. In vitro differences of  
550 neonatal and later postnatal keratinocytes and dermal fibroblasts. *Physiol Res.* 2015;  
551 64(4): 561–569.
- 552 20. Mateu R, Živicová V, Krejčí ED, Grim M, Strnad H, Vlek A, et al. Functional differences  
553 between neonatal and adult fibroblasts and keratinocytes: Donor age affects  
554 epithelial-mesenchymal crosstalk in vitro. *Int J Mol Med.* 2016; 38(4): 1063–1074.
- 555 21. Muncan V, Heijmans J, Krasinski SD, Büller N V., Wildenberg ME, Meisner S, et al.  
556 Blimp1 regulates the transition of neonatal to adult intestinal epithelium. *Nat*  
557 *Commun;* 2011; 2(1): 1–9.
- 558 22. Hislop AA, Haworth SG. Airway Size and Structure in the Normal Fetal and Infant Lung  
559 and the Effect of Premature Delivery and Artificial Ventilation. *Am Rev Respir Dis.*  
560 1989; 140(6): 1717–1726.

- 561 23. Stokes KL, Currier MG, Sakamoto K, Lee S, Collins PL, Plemper RK, et al. The  
562 respiratory syncytial virus fusion protein and neutrophils mediate the airway mucin  
563 response to pathogenic respiratory syncytial virus infection. *J Virol.* 2013; 87(18):  
564 10070–10082.
- 565 24. Hong JY, Bentley JK, Chung Y, Lei J, Steenrod JM, Chen Q, et al. Neonatal rhinovirus  
566 induces mucous metaplasia and airways hyperresponsiveness through IL-25 and type  
567 2 innate lymphoid cells. *J Allergy Clin Immunol.* 2014; 134(2): 429–39.
- 568 25. Schneider D, Hong JY, Popova AP, Bowman ER, Linn MJ, McLean AM, et al. Neonatal  
569 rhinovirus infection induces mucous metaplasia and airways hyperresponsiveness. *J*  
570 *Immunol.* 2012; 188(6): 2894–2904.
- 571 26. Rogers DF. Airway goblet cell hyperplasia in asthma: Hypersecretory and anti-  
572 inflammatory? *Clin Exp Allergy.* 2002; 32(8): 1124–1127.
- 573 27. Levy O. Innate immunity of the newborn: Basic mechanisms and clinical correlates.  
574 *Nat Rev Immunol.* 2007; 7(5): 379–390.
- 575 28. Bush A. Nosing out the future asthmatic? *Allergy.* 2000; 55: 685–687.
- 576 29. Comer DM, Elborn JS, Ennis M. Comparison of Nasal and Bronchial Epithelial Cells  
577 Obtained from Patients with COPD. *PLoS One.* 2012; 7(3): 1–8.
- 578 30. Mcnamara PS, Kicic A, Sutanto EN, Stevens PT, Stick SM. Comparison of techniques  
579 for obtaining lower airway epithelial cells from children. *Eur Respir J.* 2008; 32(3):  
580 763–768.
- 581 31. Lane C, Burgess S, Kicic A, Knight D, Stick S. The use of non-bronchoscopic brushings

- 582 to study the paediatric airway. *Respir Res.* 2005; 10: 1–10.
- 583 32. Mcdougall CM, Blaylock MG, Douglas JG, Brooker RJ, Helms PJ, Walsh GM. Nasal  
584 Epithelial Cells as Surrogates for Bronchial Epithelial Cells in Airway Inflammation  
585 Studies. *Am J Respir Crit Care Med.* 2008; 39(19): 560–568.
- 586 33. Thavagnanam S, Parker JC, McBrien ME, Skibinski G, Shields MD, Heaney LG. Nasal  
587 epithelial cells can act as a physiological surrogate for paediatric asthma studies. *PLoS*  
588 *One.* 2014; 9(1): e85802.
- 589 34. Poole A, Urbanek C, Eng C, Schageman J, Jacobson S, O’Connor BP, et al. Dissecting  
590 childhood asthma with nasal transcriptomics distinguishes subphenotypes of disease.  
591 *J Allergy Clin Immunol.* 2014; 133(3): 670–678.e12.



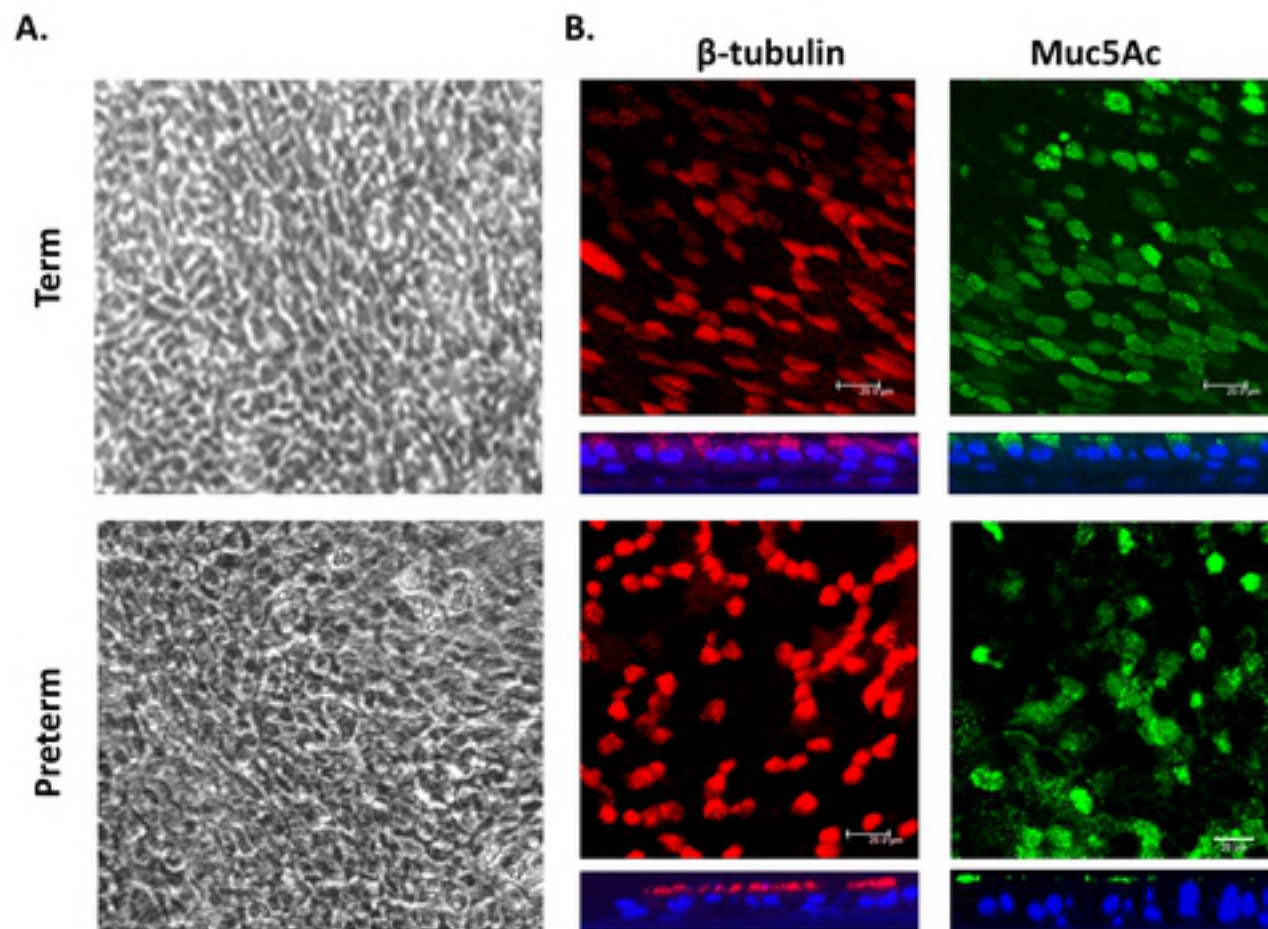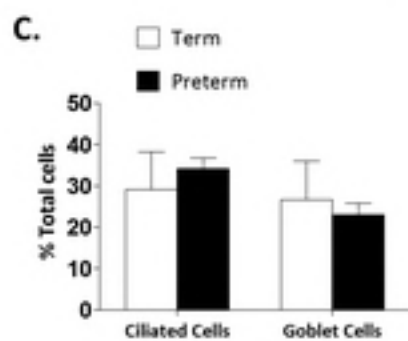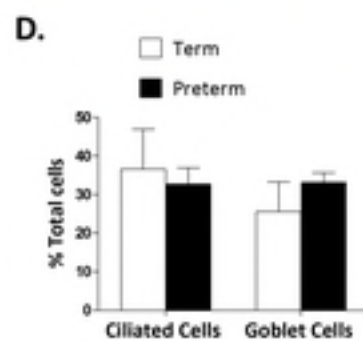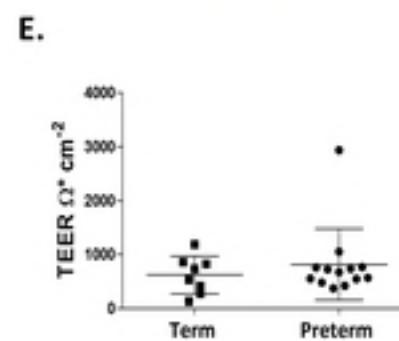

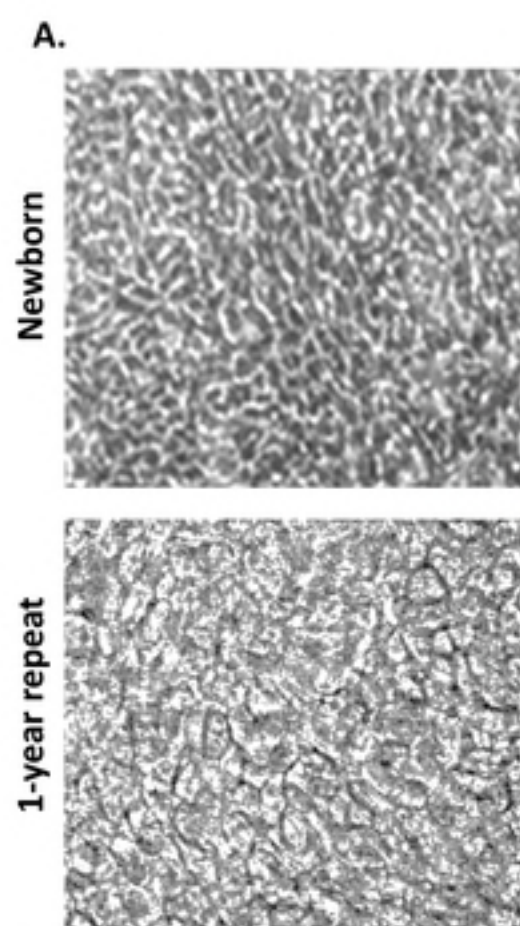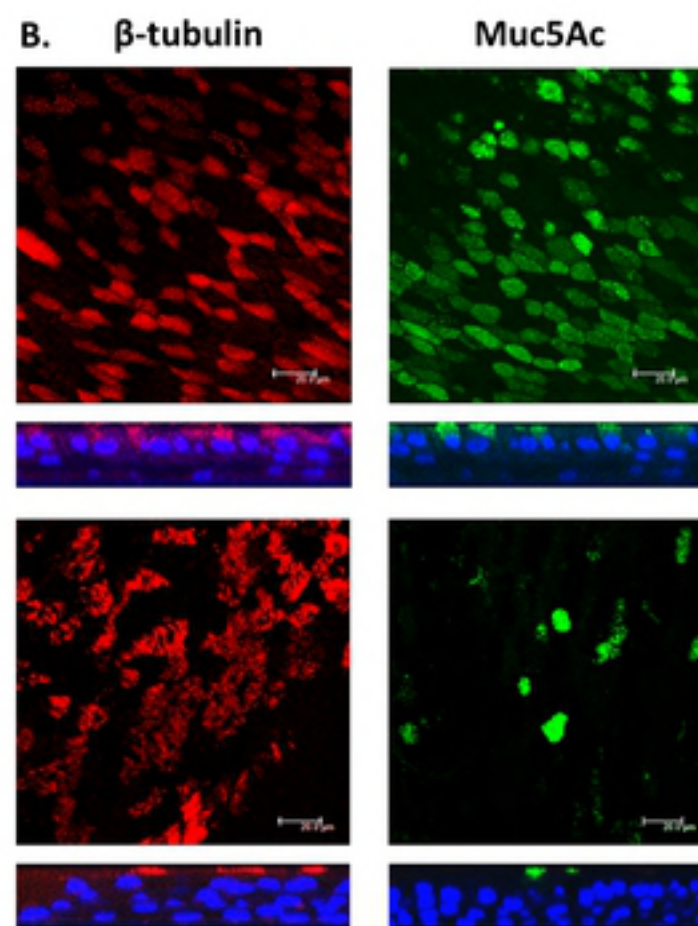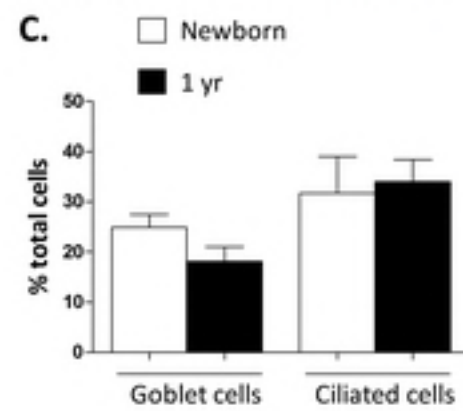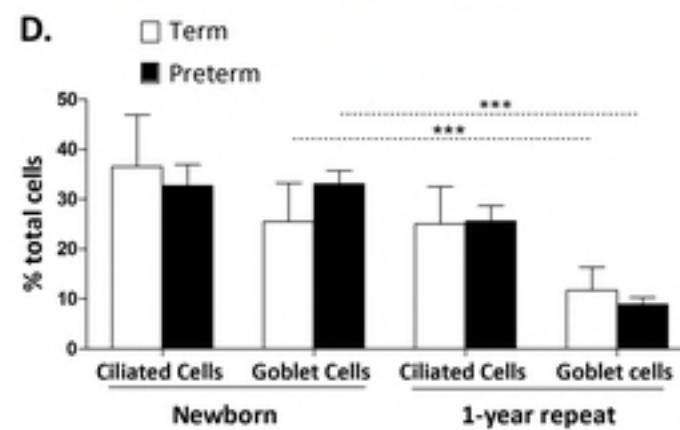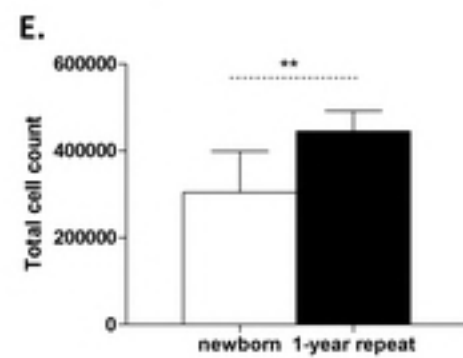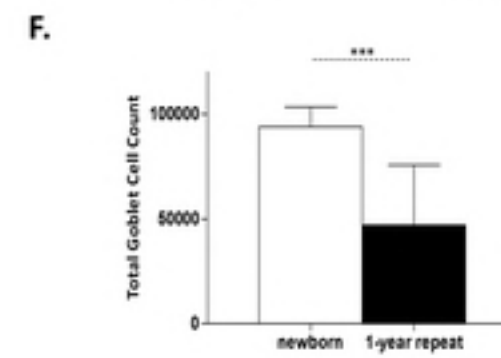

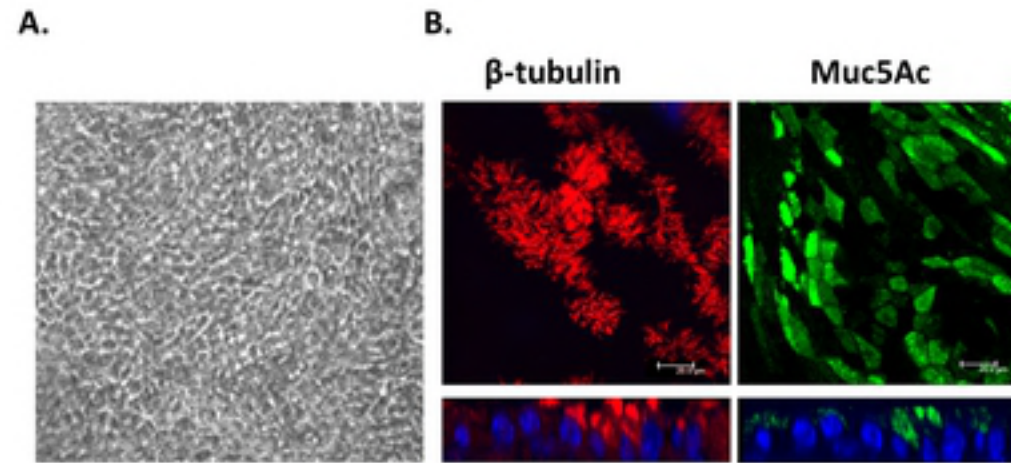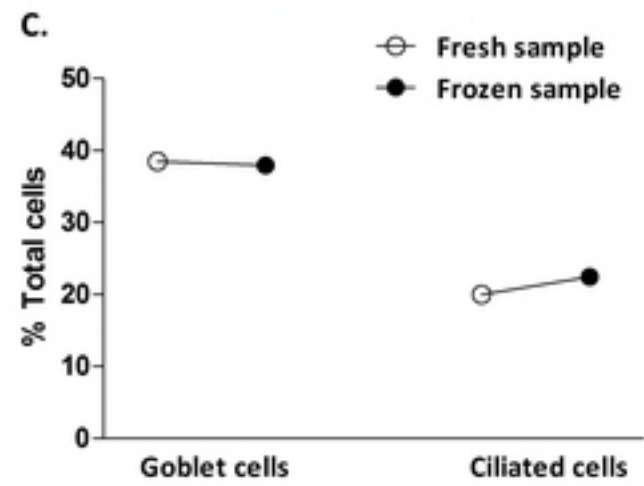

Source: http://biorxiv.org/content/10.1101/370148v1.full.pdf
